# Supplementary material
Source: Springer Nature journal article supplement (https://www.springermedizin.de/resource/supplementary/12937_2011_522_MOESM1_ESM.pdf/25653416)
Supplement: MOESM1 [file 25653416]

Enrollment

133 Assessed for eligibility

85 Excluded  
74 = Did not meet inclusion  
criteria,  
11 = Declined to participate

28 Participants consented

Allocation

4 Declined to participate further  
2 = work conflict,  
1 = lack of transportation,  
1 = personal reasons  
24 Participants randomized to intervention

Follow-Up

3 Discontinued intervention  
1 = noncompliance with protocol,  
1 = moved out of state,  
1 = personal reasons

Analysis

21 Completed study  
4 Excluded from analysis  
3 = medical complications  
1 = non-compliance  
17 Analyzed
